# Supplementary material
Source: MDPI journal article supplement (https://www.mdpi.com/2073-4433/12/7/809)
Supplement: s1 [file s1]

## Supplementary Materials

# Seasonal Variation Characteristics of Bacteria and Fungi in PM<sub>2.5</sub> in Typical Basin Cities of Xi'an and Linfen, China

Sen Wang <sup>1,2,\*</sup>, Wanyu Liu <sup>1,2</sup>, Jun Li <sup>1,2</sup>, Haotian Sun <sup>1,2</sup>, Yali Qian <sup>1,2</sup>, Liuyi Ding <sup>1,2</sup>, Hao Ma <sup>1,2</sup> and Jiao Li <sup>1,2</sup>

<sup>1</sup> Shaanxi Key Laboratory of Earth Surface System and Environmental Carrying Capacity, College of Urban and Environmental Science, Northwest University, Xi'an 710127, China; liuwanyu@stumail.nwu.edu.cn (W.L.); 201931878@stumail.nwu.edu.cn (J.L.); sunhaotian@nwu.edu.cn (H.S.); 201631652@stumail.nwu.edu.cn (Y.Q.); 201620794@stumail.nwu.edu.cn (L.D.); 201820837@stumail.nwu.edu.cn (H.M.); lijiao2@stumail.nwu.edu.cn (J.L.)

<sup>2</sup> Shannxi Xi'an Urban Forest Ecosystem Research Station, Xi'an 710127, China;

\* Correspondence: wangsen@nwu.edu.cn

Five table (Table S1-S5) and three figure (Figure S1-S3), 17 pages.

### Lists of tables:

Table S1 Pollution and meteorological data in sampling period of Xi'an and Linfen.

Table S2 Functional groups related to the carbon cycling.

Table S3 Functional groups related to the nitrogen cycling.

Table S4 Functional groups related to the human pathogens.

Table S5 Functional groups related to the sulfur cycling.

# Tables

**Table S1** Pollution and meteorological data in sampling period of Xi'an and Linfen.

| Sample | Group | Year | Date        | PM <sub>2.5</sub><br>(ug/m <sup>3</sup> ) | PM <sub>10</sub><br>(ug/m <sup>3</sup> ) | CO<br>(mg/m <sup>3</sup> ) | NO <sub>2</sub> (ug/m <sup>3</sup> ) | SO <sub>2</sub><br>(ug/m <sup>3</sup> ) | O <sub>3</sub><br>(ug/m <sup>3</sup> ) | AQI | Temperature<br>(°C) | Relative humidity<br>(%) | Wind<br>scale |
|--------|-------|------|-------------|-------------------------------------------|------------------------------------------|----------------------------|--------------------------------------|-----------------------------------------|----------------------------------------|-----|---------------------|--------------------------|---------------|
| XA1    | WXA   | 2017 | December 24 | 43                                        | 150                                      | 1.4                        | 57                                   | 22                                      | 88                                     | 100 | 4                   | 34                       | 1             |
| XA2    | WXA   |      | December 25 | 93                                        | 197                                      | 1.9                        | 74                                   | 32                                      | 39                                     | 129 | 1                   | 49                       | 1             |
| XA3    | WXA   |      | December 26 | 139                                       | 217                                      | 2.7                        | 107                                  | 45                                      | 21                                     | 183 | 2                   | 53                       | 1             |
| XA4    | WXA   |      | December 27 | 236                                       | 308                                      | 3.1                        | 121                                  | 45                                      | 26                                     | 281 | 1                   | 67                       | 0             |
| XA5    | WXA   |      | December 28 | 288                                       | 350                                      | 3                          | 99                                   | 35                                      | 62                                     | 337 | 1                   | 73                       | 0             |
| XA6    | WXA   | 2018 | January 1   | 160                                       | 310                                      | 2.4                        | 83                                   | 30                                      | 60                                     | 215 | 1                   | 65                       | 0             |
| XA7    | WXA   |      | January 2   | 225                                       | 368                                      | 2.9                        | 91                                   | 57                                      | 10                                     | 278 | 0                   | 78                       | 0             |
| XA8    | WXA   |      | January 3   | 163                                       | 274                                      | 2.5                        | 71                                   | 21                                      | 13                                     | 207 | 0                   | 91                       | 1             |
| XA9    | WXA   |      | January 4   | 91                                        | 102                                      | 1.2                        | 42                                   | 14                                      | 38                                     | 120 | -3                  | 92                       | 0             |
| XA10   | WXA   |      | January 5   | 124                                       | 136                                      | 1.5                        | 43                                   | 26                                      | 37                                     | 163 | -3                  | 87                       | 1             |
| XA11   | WXA   |      | January 6   | 128                                       | 150                                      | 1.8                        | 29                                   | 22                                      | 69                                     | 168 | -2                  | 96                       | 0             |
| XA12   | WXA   |      | January 7   | 95                                        | 116                                      | 1.6                        | 28                                   | 27                                      | 98                                     | 125 | 0                   | 84                       | 1             |
| XA13   | WXA   |      | January 8   | 38                                        | 84                                       | 0.9                        | 33                                   | 24                                      | 107                                    | 68  | -1                  | 55                       | 1             |
| XA14   | WXA   |      | January 9   | 88                                        | 147                                      | 1.5                        | 59                                   | 34                                      | 98                                     | 124 | 0                   | 60                       | 0             |
| XA15   | SPXA  |      | April 19    | 38                                        | 148                                      | 1.3                        | 62                                   | 10                                      | 138                                    | 102 | 23                  | 58                       | 1             |
| XA16   | SPXA  |      | April 20    | 46                                        | 112                                      | 1.3                        | 29                                   | 11                                      | 126                                    | 83  | 21                  | 71                       | 1             |
| XA17   | SPXA  |      | April 21    | 38                                        | 57                                       | 1.3                        | 30                                   | 9                                       | 133                                    | 62  | 20                  | 81                       | 1             |
| XA18   | SPXA  |      | April 22    | 83                                        | 92                                       | 1.3                        | 54                                   | 8                                       | 104                                    | 113 | 19                  | 88                       | 1             |
| XA19   | SPXA  |      | April 24    | 25                                        | 51                                       | 1.2                        | 21                                   | 8                                       | 58                                     | 50  | 14                  | 87                       | 1             |
| XA20   | SPXA  |      | April 25    | 15                                        | 28                                       | 1.1                        | 21                                   | 8                                       | 89                                     | 30  | 14                  | 87                       | 1             |
| XA21   | SPXA  |      | April 26    | 20                                        | 45                                       | 1                          | 40                                   | 8                                       | 155                                    | 45  | 17                  | 75                       | 0             |
| XA22   | SUXA  |      | July 30     | 21                                        | 39                                       | 0.8                        | 28                                   | 5                                       | 163                                    | 47  | 29                  | 74                       | 1             |
| XA23   | SUXA  |      | July 31     | 22                                        | 39                                       | 0.9                        | 27                                   | 4                                       | 177                                    | 42  | 27                  | 80                       | 0             |

|      |      |            |     |     |     |    |     |     |     |    |    |   |
|------|------|------------|-----|-----|-----|----|-----|-----|-----|----|----|---|
| XA24 | SUXA | August 1   | 21  | 41  | 0.7 | 21 | 5   | 202 | 45  | 28 | 80 | 1 |
| XA25 | SUXA | August 2   | 12  | 25  | 0.6 | 37 | 6   | 107 | 30  | 30 | 64 | 0 |
| XA26 | SUXA | August 3   | 33  | 54  | 0.7 | 37 | 6   | 247 | 67  | 30 | 67 | 1 |
| XA27 | SUXA | August 4   | 36  | 67  | 0.8 | 36 | 6   | 249 | 79  | 30 | 63 | 1 |
| XA28 | SUXA | August 5   | 40  | 70  | 0.8 | 51 | 6   | 276 | 78  | 30 | 64 | 0 |
| XA29 | AXA  | October 27 | 49  | 77  | 0.8 | 59 | 9   | 91  | 72  | 10 | 64 | 0 |
| XA30 | AXA  | October 28 | 30  | 70  | 0.8 | 55 | 9   | 102 | 60  | 13 | 51 | 1 |
| XA31 | AXA  | October 29 | 27  | 59  | 0.7 | 53 | 9   | 103 | 54  | 13 | 47 | 0 |
| XA32 | AXA  | October 30 | 26  | 64  | 0.7 | 54 | 8   | 102 | 56  | 14 | 43 | 0 |
| XA33 | AXA  | November 5 | 30  | 46  | 0.8 | 41 | 7   | 28  | 45  | 6  | 94 | 1 |
| XA34 | AXA  | November 6 | 19  | 24  | 0.7 | 28 | 7   | 54  | 29  | 5  | 93 | 1 |
| XA35 | AXA  | November 7 | 25  | 31  | 0.8 | 38 | 7   | 81  | 40  | 5  | 92 | 0 |
| LF1  | WLF  | January 16 | 312 | 416 | 5.4 | 94 | 179 | 81  | 354 | 0  | 64 | 1 |
| LF2  | WLF  | January 17 | 172 | 239 | 3.1 | 58 | 143 | 73  | 219 | 1  | 49 | 1 |
| LF3  | WLF  | January 18 | 117 | 180 | 2.3 | 69 | 173 | 30  | 151 | 0  | 49 | 0 |
| LF4  | WLF  | January 19 | 232 | 298 | 4.3 | 89 | 209 | 57  | 279 | 0  | 58 | 1 |
| LF5  | WLF  | January 22 | 274 | 392 | 4.8 | 93 | 248 | 81  | 314 | 2  | 56 | 1 |
| LF6  | WLF  | January 23 | 21  | 55  | 1   | 31 | 47  | 64  | 51  | 0  | 27 | 1 |
| LF7  | WLF  | January 24 | 74  | 124 | 1.8 | 54 | 126 | 49  | 108 | -1 | 32 | 1 |
| LF8  | SPLF | April 18   | 65  | 161 | 1.6 | 46 | 34  | 207 | 106 | 21 | 47 | 1 |
| LF9  | SPLF | April 19   | 59  | 143 | 1.3 | 24 | 22  | 238 | 100 | 23 | 44 | 1 |
| LF10 | SPLF | April 20   | 48  | 106 | 1.2 | 25 | 14  | 181 | 83  | 22 | 47 | 1 |
| LF11 | SPLF | April 21   | 89  | 121 | 2.1 | 32 | 15  | 95  | 118 | 19 | 88 | 1 |
| LF12 | SPLF | April 22   | 49  | 71  | 1.5 | 21 | 22  | 78  | 71  | 16 | 65 | 2 |
| LF13 | SPLF | April 24   | 57  | 94  | 2.1 | 33 | 23  | 80  | 81  | 16 | 67 | 2 |
| LF14 | SPLF | April 25   | 82  | 111 | 2   | 27 | 15  | 103 | 110 | 15 | 74 | 1 |
| LF15 | SPLF | April 26   | 83  | 127 | 1.9 | 37 | 16  | 174 | 111 | 17 | 68 | 1 |

|      |      |            |    |     |     |    |    |     |     |    |    |   |
|------|------|------------|----|-----|-----|----|----|-----|-----|----|----|---|
| LF16 | SPLF | April 27   | 79 | 138 | 1.7 | 30 | 19 | 203 | 110 | 21 | 51 | 1 |
| LF17 | SULF | July 30    | 51 | 77  | 1.1 | 18 | 20 | 173 | 74  | 28 | 66 | 1 |
| LF18 | SULF | July 31    | 40 | 65  | 1   | 24 | 11 | 152 | 61  | 25 | 87 | 1 |
| LF19 | SULF | August 1   | 34 | 53  | 0.8 | 16 | 9  | 125 | 53  | 27 | 76 | 1 |
| LF20 | SULF | August 2   | 42 | 64  | 0.9 | 19 | 7  | 147 | 62  | 28 | 69 | 1 |
| LF21 | SULF | August 3   | 70 | 102 | 1.1 | 20 | 8  | 214 | 96  | 29 | 62 | 1 |
| LF22 | SULF | August 4   | 89 | 129 | 1.2 | 25 | 18 | 301 | 126 | 30 | 56 | 1 |
| LF23 | SULF | August 5   | 49 | 78  | 1   | 18 | 15 | 187 | 71  | 30 | 52 | 1 |
| LF24 | ALF  | October 27 | 28 | 86  | 1.3 | 47 | 23 | 124 | 69  | 9  | 38 | 1 |
| LF25 | ALF  | October 28 | 30 | 81  | 1.6 | 46 | 25 | 90  | 61  | 12 | 32 | 1 |
| LF26 | ALF  | October 29 | 24 | 75  | 1.2 | 43 | 20 | 94  | 56  | 13 | 33 | 1 |
| LF27 | ALF  | October 30 | 29 | 87  | 1.3 | 50 | 26 | 104 | 67  | 11 | 39 | 1 |
| LF28 | ALF  | October 31 | 29 | 94  | 1.1 | 52 | 29 | 84  | 72  | 11 | 37 | 1 |
| LF29 | ALF  | November 1 | 70 | 137 | 1.5 | 70 | 58 | 162 | 105 | 13 | 33 | 1 |
| LF30 | ALF  | November 2 | 54 | 103 | 1.1 | 39 | 14 | 177 | 81  | 13 | 45 | 1 |

---

**Table S2** Functional groups related to the carbon cycling.

| Groups                                                          | WXA    | SPXA   | SUXA   | AXA    | WLF    | SPLF   | SULF   | ALF    |
|-----------------------------------------------------------------|--------|--------|--------|--------|--------|--------|--------|--------|
| aerobic chemoheterotrophy                                       | 22.16% | 20.31% | 19.55% | 16.39% | 4.34%  | 22.13% | 18.75% | 18.39% |
| chemoheterotrophy                                               | 24.07% | 20.20% | 9.40%  | 27.34% | 11.92% | 26.82% | 19.08% | 15.07% |
| phototrophy                                                     | 1.27%  | 2.12%  | 0.45%  | 1.57%  | 0.28%  | 0.29%  | 0.92%  | 0.51%  |
| photoautotrophy                                                 | 0.92%  | 0.66%  | 0.32%  | 0.25%  | 0.21%  | 0.11%  | 0.60%  | 0.36%  |
| photoheterotrophy                                               | 0.76%  | 1.42%  | 0.12%  | 0.61%  | 0.18%  | 0.14%  | 0.33%  | 1.02%  |
| anoxygenic photoautotrophy S oxidizing                          | 0.02%  | 0.01%  | 0.00%  | 0.00%  | 0.01%  | 0.00%  | 0.00%  | 0.01%  |
| anoxygenic photoautotrophy                                      | 0.02%  | 0.01%  | 0.00%  | 0.00%  | 0.01%  | 0.01%  | 0.00%  | 0.01%  |
| oxygenic photoautotrophy                                        | 0.76%  | 0.65%  | 0.32%  | 0.25%  | 0.20%  | 0.10%  | 0.60%  | 0.35%  |
| cellulolysis                                                    | 0.09%  | 0.04%  | 0.02%  | 0.07%  | 0.09%  | 0.05%  | 0.02%  | 0.10%  |
| methyлотrophy                                                   | 1.17%  | 1.29%  | 1.43%  | 1.82%  | 1.84%  | 0.88%  | 1.66%  | 4.00%  |
| methanol oxidation                                              | 1.14%  | 1.12%  | 1.43%  | 1.80%  | 1.83%  | 1.02%  | 1.22%  | 2.86%  |
| hydrocarbon degradation                                         | 10.14% | 4.67%  | 3.62%  | 1.07%  | 10.86% | 6.00%  | 4.67%  | 1.81%  |
| methanotrophy                                                   | 0.04%  | 0.03%  | 0.00%  | 0.02%  | 0.01%  | 0.04%  | 0.03%  | 0.03%  |
| methanogenesis                                                  | 0.00%  | 0.00%  | 0.00%  | 0.00%  | 0.00%  | 0.00%  | 0.00%  | 0.01%  |
| cyanobacteria                                                   | 0.76%  | 0.65%  | 0.32%  | 0.25%  | 0.20%  | 0.10%  | 0.60%  | 0.35%  |
| animal parasites or symbionts                                   | 2.84%  | 8.16%  | 17.62% | 7.41%  | 4.99%  | 6.30%  | 8.81%  | 6.06%  |
| human gut                                                       | 0.39%  | 0.75%  | 1.76%  | 0.47%  | 1.60%  | 0.94%  | 0.60%  | 0.86%  |
| mammal gut                                                      | 0.57%  | 0.66%  | 1.76%  | 0.79%  | 1.69%  | 0.94%  | 0.60%  | 1.33%  |
| chloroplasts                                                    | 1.75%  | 1.51%  | 0.37%  | 1.09%  | 1.16%  | 5.91%  | 0.75%  | 2.61%  |
| methanogenesis by CO <sub>2</sub> reduction with H <sub>2</sub> | 0.00%  | 0.00%  | 0.00%  | 0.00%  | 0.00%  | 0.00%  | 0.00%  | 0.01%  |
| hydrogenotrophic methanogenesis                                 | 0.00%  | 0.00%  | 0.00%  | 0.00%  | 0.00%  | 0.00%  | 0.00%  | 0.01%  |
| aromatic hydrocarbon degradation                                | 0.19%  | 0.13%  | 0.15%  | 0.29%  | 3.35%  | 0.07%  | 0.24%  | 0.11%  |
| aromatic compound degradation                                   | 1.83%  | 3.24%  | 4.27%  | 3.17%  | 3.20%  | 4.56%  | 5.25%  | 4.06%  |
| aliphatic non methane hydrocarbon degradation                   | 0.17%  | 0.10%  | 0.08%  | 0.10%  | 2.98%  | 0.06%  | 0.07%  | 0.16%  |
| fumarate respiration                                            | 0.01%  | 0.00%  | 0.00%  | 0.00%  | 0.00%  | 0.00%  | 0.00%  | 0.00%  |

|                        |       |        |        |       |        |       |        |       |
|------------------------|-------|--------|--------|-------|--------|-------|--------|-------|
| reductive acetogenesis | 0.01% | 0.00%  | 0.00%  | 0.00% | 0.00%  | 0.01% | 0.00%  | 0.01% |
| fermentation           | 4.98% | 11.99% | 17.74% | 7.81% | 18.99% | 8.99% | 12.71% | 5.73% |

---

**Table S3** Functional groups related to the nitrogen cycling.

| Groups                        | WXA   | SPXA  | SUXA  | AXA   | WLF   | SPLF  | SULF  | ALF   |
|-------------------------------|-------|-------|-------|-------|-------|-------|-------|-------|
| aerobic ammonia oxidation     | 0.10% | 0.23% | 0.01% | 0.08% | 0.02% | 0.07% | 0.01% | 0.13% |
| aerobic nitrite oxidation     | 0.17% | 0.12% | 0.07% | 0.05% | 0.06% | 0.02% | 0.06% | 0.08% |
| nitrification                 | 0.25% | 0.36% | 0.08% | 0.11% | 0.08% | 0.06% | 0.07% | 0.24% |
| nitrate denitrification       | 0.58% | 0.74% | 0.45% | 1.59% | 0.38% | 0.46% | 0.82% | 1.71% |
| nitrite denitrification       | 0.58% | 0.74% | 0.45% | 1.59% | 0.38% | 0.46% | 0.82% | 1.71% |
| nitrous oxide denitrification | 0.58% | 0.74% | 0.45% | 1.59% | 0.38% | 0.46% | 0.82% | 1.71% |
| denitrification               | 0.58% | 0.74% | 0.45% | 1.59% | 0.38% | 0.46% | 0.82% | 1.71% |
| nitrate ammonification        | 0.90% | 0.06% | 0.03% | 0.05% | 0.40% | 0.10% | 0.09% | 0.16% |
| nitrite ammonification        | 0.78% | 0.11% | 0.28% | 0.26% | 0.62% | 0.15% | 0.24% | 0.49% |
| nitrite respiration           | 1.75% | 1.21% | 0.80% | 1.91% | 0.70% | 0.71% | 0.70% | 2.45% |
| nitrate respiration           | 2.52% | 1.10% | 1.00% | 0.65% | 1.63% | 0.74% | 1.54% | 2.35% |
| nitrate reduction             | 4.30% | 6.34% | 5.68% | 3.56% | 8.51% | 3.57% | 3.75% | 4.03% |
| nitrogen respiration          | 2.26% | 0.91% | 1.25% | 1.92% | 1.91% | 0.71% | 1.55% | 2.00% |
| nitrogen fixation             | 0.22% | 0.23% | 0.29% | 0.24% | 0.03% | 0.09% | 0.25% | 0.37% |
| ureolysis                     | 1.72% | 1.19% | 1.45% | 3.39% | 5.54% | 1.37% | 1.19% | 3.49% |

**Table S4** Functional groups related to the human pathogens.

| <b>Groups</b>              | <b>WXA</b> | <b>SPXA</b> | <b>SUXA</b> | <b>AXA</b> | <b>WLF</b> | <b>SPLF</b> | <b>SULF</b> | <b>ALF</b> |
|----------------------------|------------|-------------|-------------|------------|------------|-------------|-------------|------------|
| human pathogens septicemia | 0.25%      | 0.14%       | 0.10%       | 0.36%      | 0.04%      | 0.09%       | 0.07%       | 0.96%      |
| human pathogens pneumonia  | 0.00%      | 0.02%       | 0.05%       | 0.03%      | 0.01%      | 0.01%       | 0.04%       | 0.02%      |
| human pathogens nosocomia  | 0.03%      | 0.02%       | 0.05%       | 0.04%      | 0.01%      | 0.01%       | 0.16%       | 0.02%      |
| human pathogens meningitis | 0.25%      | 0.12%       | 0.06%       | 0.39%      | 0.02%      | 0.08%       | 0.04%       | 1.12%      |
| human pathogens diarrhea   | 0.03%      | 0.06%       | 0.45%       | 0.01%      | 0.13%      | 0.08%       | 0.10%       | 0.02%      |
| human pathogens all        | 2.33%      | 2.38%       | 3.63%       | 3.87%      | 1.66%      | 2.71%       | 6.32%       | 4.33%      |
| plant pathogen             | 0.94%      | 0.13%       | 0.12%       | 0.05%      | 0.48%      | 0.14%       | 0.18%       | 0.25%      |



**Table S5** Functional groups related to the sulfur cycling.

| <b>Groups</b>                      | <b>WXA</b> | <b>SPXA</b> | <b>SUXA</b> | <b>AXA</b> | <b>WLF</b> | <b>SPLF</b> | <b>SULF</b> | <b>ALF</b> |
|------------------------------------|------------|-------------|-------------|------------|------------|-------------|-------------|------------|
| sulfate respiration                | 0.06%      | 0.04%       | 0.04%       | 0.04%      | 0.39%      | 0.09%       | 0.00%       | 0.02%      |
| sulfur respiration                 | 0.02%      | 0.05%       | 0.17%       | 0.03%      | 0.00%      | 0.10%       | 0.07%       | 0.10%      |
| sulfite respiration                | 0.01%      | 0.00%       | 0.00%       | 0.00%      | 0.00%      | 0.00%       | 0.00%       | 0.00%      |
| thiosulfate respiration            | 0.00%      | 0.00%       | 0.00%       | 0.01%      | 0.00%      | 0.00%       | 0.01%       | 0.01%      |
| respiration of sulfur compounds    | 0.08%      | 0.12%       | 0.13%       | 0.07%      | 0.39%      | 0.25%       | 0.08%       | 0.13%      |
| dark sulfide oxidation             | 0.03%      | 0.01%       | 0.00%       | 0.04%      | 0.00%      | 0.00%       | 0.00%       | 0.01%      |
| dark oxidation of sulfur compounds | 0.05%      | 0.02%       | 0.02%       | 0.06%      | 0.01%      | 0.03%       | 0.04%       | 0.03%      |

**List of figure:**

Fig. S1. Bacterial community functions were predicted using Tax4Fun2 algorithm during different seasons. (a) At level 1. (b) Top 20 KEGG subsystems at level 2.

Fig. S2. The relative abundance of carbon cycling, nitrogen cycling, sulfur cycling, and human pathogens in Xi'an and Linfen.

Fig. S3. Heatmap based on relative abundance (%) of pathogenic fungi in all PM<sub>2.5</sub> samples.

## Figures

a

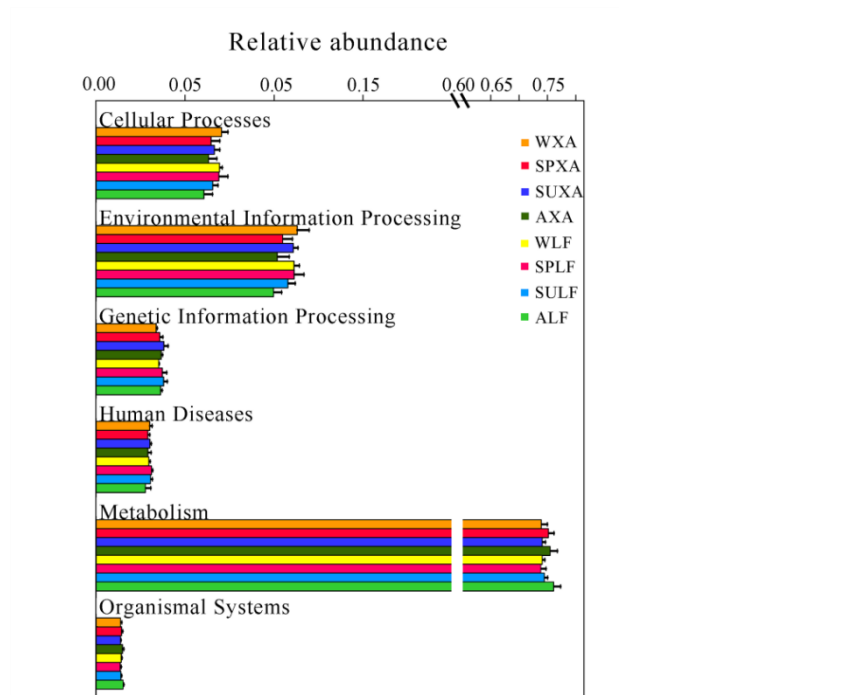

b

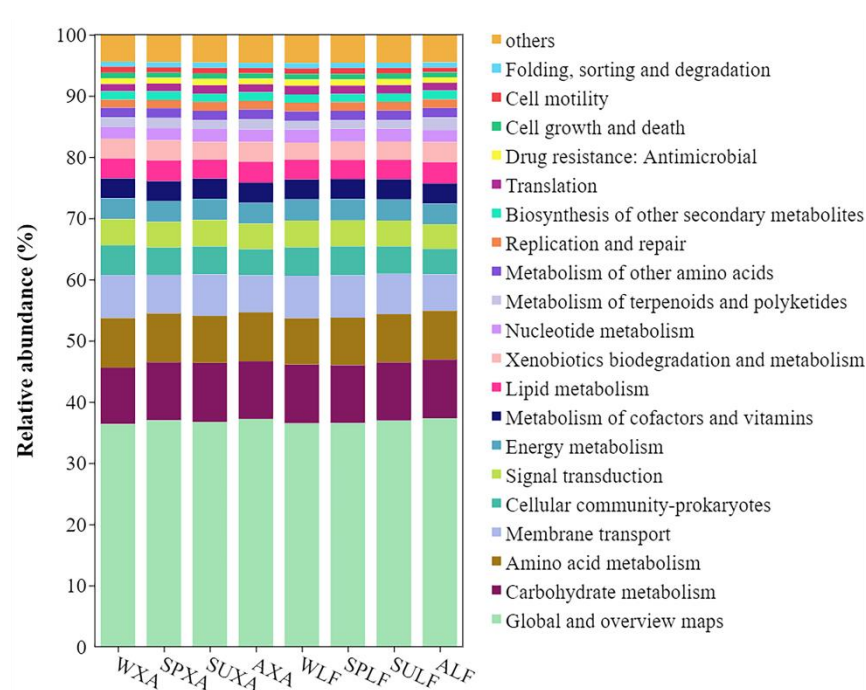

**Fig. S1.** Bacterial community functions were predicted using Tax4Fun2 algorithm during different seasons. (a) At level 1. (b) Top 20 KEGG subsystems at level 2.

a

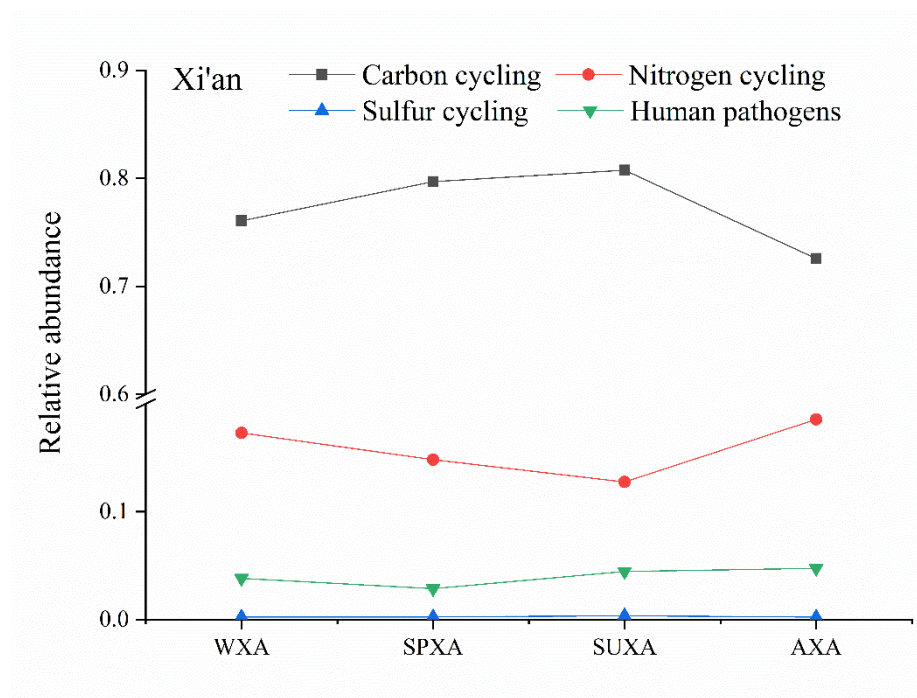

b

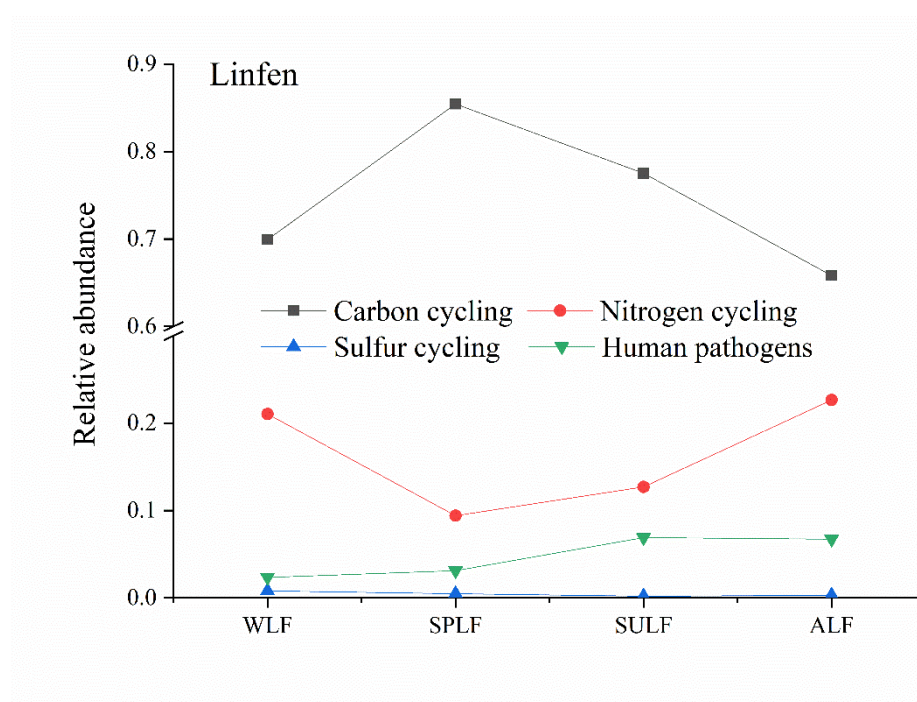

**Fig. S2.** The relative abundance of carbon cycling, nitrogen cycling, sulfur cycling, and human pathogens in Xi'an and Linfen.

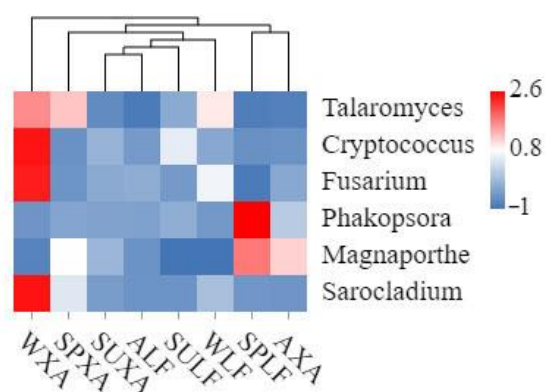

**Fig. S3.** Heatmap based on relative abundance (%) of pathogenic fungi in all PM<sub>2.5</sub> samples.
